# Supplementary material for: Encapsulation of ovarian allograft precludes immune rejection and promotes restoration of endocrine function in immune-competent ovariectomized mice
Source: PubMed Central journal article supplement (PMC6851353; doi:10.1038/s41598-019-53075-8), 2019-11-12
Supplement: 41598_2019_53075_MOESM1_ESM.pdf [file 41598_2019_53075_MOESM1_ESM.pdf]

**Encapsulation of ovarian allograft precludes immune rejection and promotes restoration of endocrine function in immune-competent ovariectomized mice**

James Ronald Day<sup>\*,1</sup>, Anu David<sup>\*,1</sup>, Mayara Garcia de Mattos Barbosa<sup>4,5</sup>, Margaret Ann Hammersley<sup>1</sup>, Marilia Cascalho<sup>4,5</sup>, Ariella Shikanov<sup>1,2,3</sup>

<sup>1</sup>Department of Biomedical Engineering, University of Michigan, Ann Arbor, USA

<sup>2</sup>Department of Macromolecular Science & Engineering, University of Michigan, Ann Arbor, USA

<sup>3</sup>Department of Obstetrics and Gynecology, University of Michigan, Ann Arbor, USA

<sup>4</sup>Department of Surgery, University of Michigan, Ann Arbor, USA

<sup>5</sup>Department of Microbiology & Immunology, University of Michigan, Ann Arbor, USA

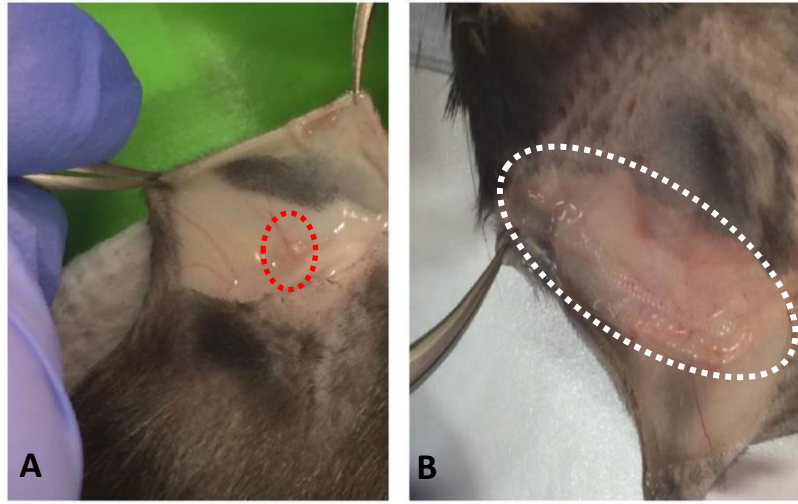

**Supplemental Figure 1: (A)** Non-encapsulated allogeneic ovarian tissue and **(B)** TheraCyte after 60 days of subcutaneous implantation in ovariectomized mice
